# Supplementary material for: Reverse-phase high performance liquid chromatography separation of positional isomers on a MIL-53(Fe) packed column
Source: Royal Society of Chemistry journal article supplement (doi:10.1039/c5ra02262b), 2015-01-01
Supplement: c5ra02262b1.pdf [file c5ra02262b1.pdf]

## Supplementary Data

### Reverse-phase high performance liquid chromatography separation of positional isomers on the MIL-53(Fe) packed column

Zhiming Yan<sup>a</sup>, Wenmin Zhang<sup>a</sup>, Jia Gao<sup>a</sup>, Yifen Lin<sup>a</sup>, Jianrong Li<sup>c</sup>, Zian, Lin <sup>a\*</sup>, Lan Zhang <sup>a,b\*</sup>

<sup>a</sup> Ministry of Education Key Laboratory of Analysis and Detection for Food Safety, Fujian Provincial Key Laboratory of Analysis and Detection Technology for Food Safety, College of Chemistry, Fuzhou University, Fuzhou, Fujian, 350116, China

<sup>b</sup> Testing Center, The Sport Science Research Center, Fuzhou University, Fuzhou, Fujian, 350002, China

<sup>c</sup> Food Safety Key laboratory of Liaoning Province, Bohai University, Jinzhou, Liaoning, 11 121013, China

● **Corresponding author:** Zian Lin; Lan Zhang

● **Postal address:** College of Chemistry, Fuzhou University,  
Fuzhou, Fujian, 350116, China

● **Tel:** 86-591-22866135

● **Fax:** 86-591-22866135

**E-mail:** zianlin@fzu.edu.cn (Z.A. Lin); zlan@fzu.edu.cn (L. Zhang)

## SUMMARY

This supporting information file includes additional results and informations as described in the text of the main article. Including:

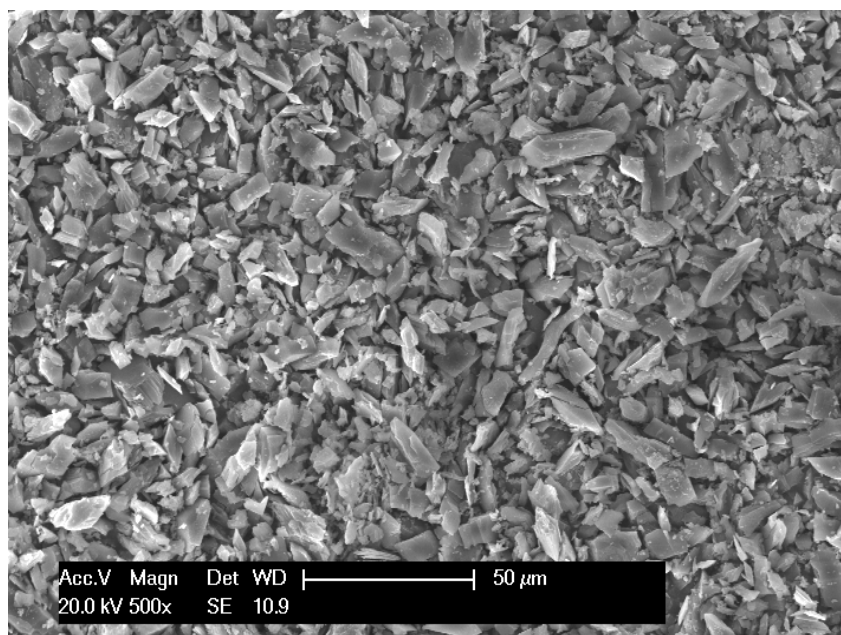

**Fig. S1.** SEM images of MIL-53(Fe) after HPLC analysis

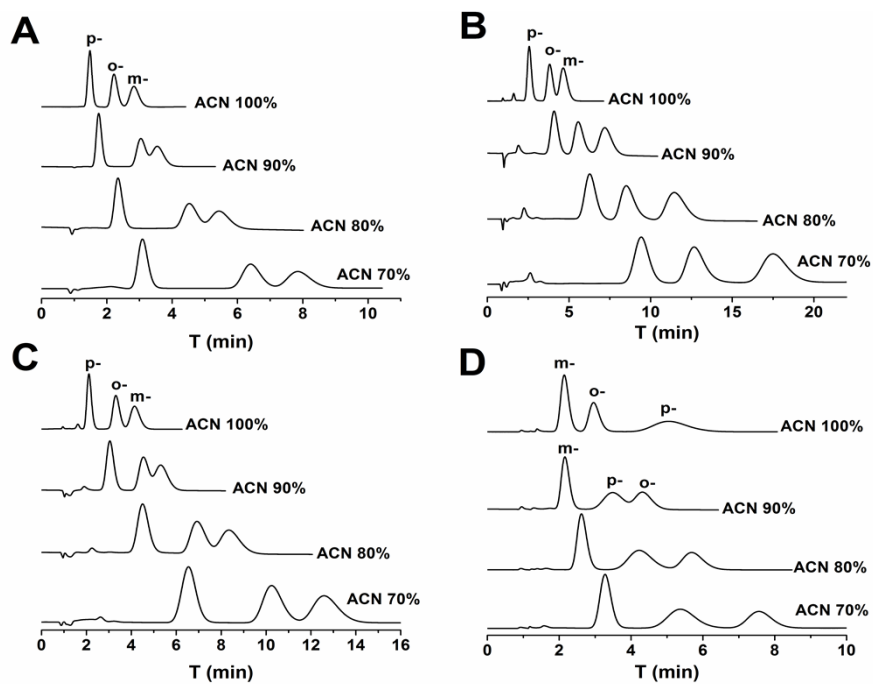

**Fig. S2.** HPLC chromatograms for the separation of : (A) xylene; (B) dichlorobenzene; (C) chlorotoluene; (D) nitroaniline on the MIL-53(Fe) packed column using different ratios of ACN/H<sub>2</sub>O as the mobile phase at a flow rate of 0.6 mL min<sup>-1</sup>. All the separations were performed at room temperature and monitored with a UV detector at 254 nm.

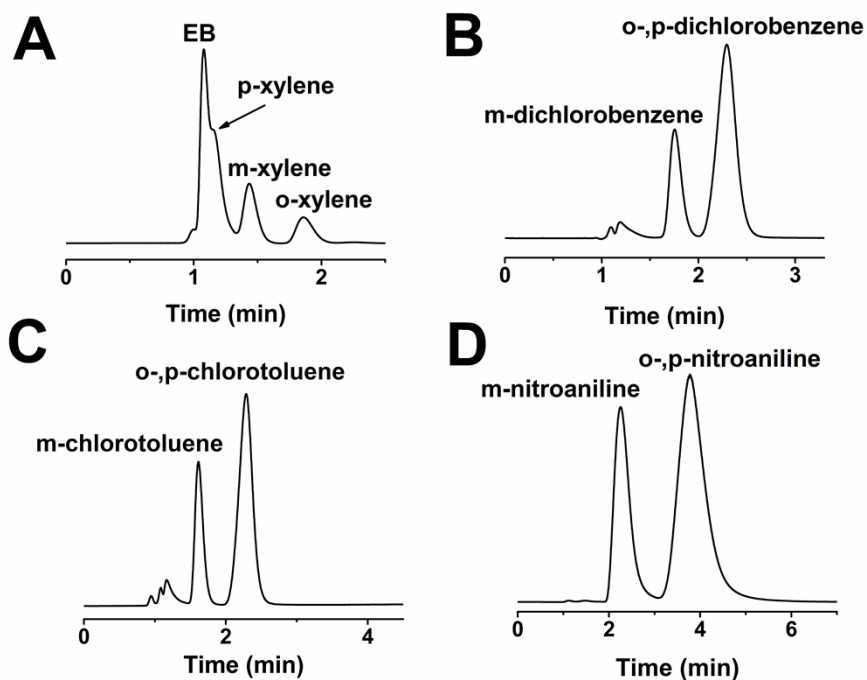

**Fig. S3.** HPLC chromatograms on the MIL-53(AI) packed column for the separation of (A) xylene isomers; (B) dichlorobenzene isomers; (C) chlorotoluene isomers; (D) nitroaniline isomers using 100% ACN as the mobile phase at a flow rate of 0.6 mL min<sup>-1</sup>. All the separations were performed at room temperature and monitored with a UV detector at 254 nm.

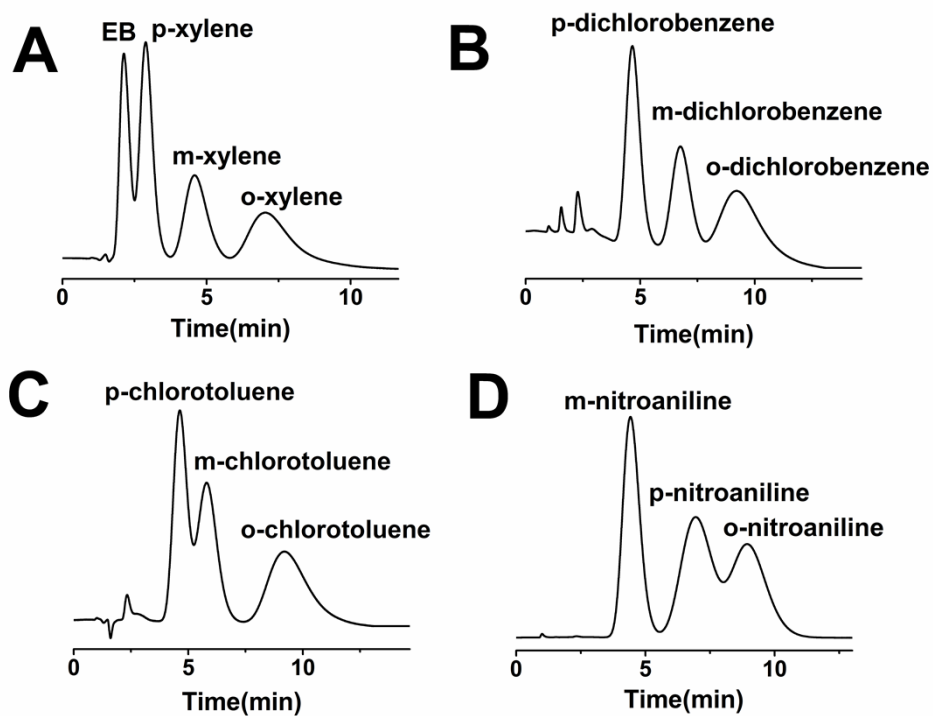

**Fig. S4.** HPLC chromatograms on the MIL-53(Cr) packed column for the separation of (A) xylene isomers; (B) dichlorobenzene isomers; (C) chlorotoluene isomers; (D) nitroaniline isomers using 100% ACN as the mobile phase at a flow rate of 0.6 mL min<sup>-1</sup>. All the separations were performed at room temperature and monitored with a UV detector at 254 nm.

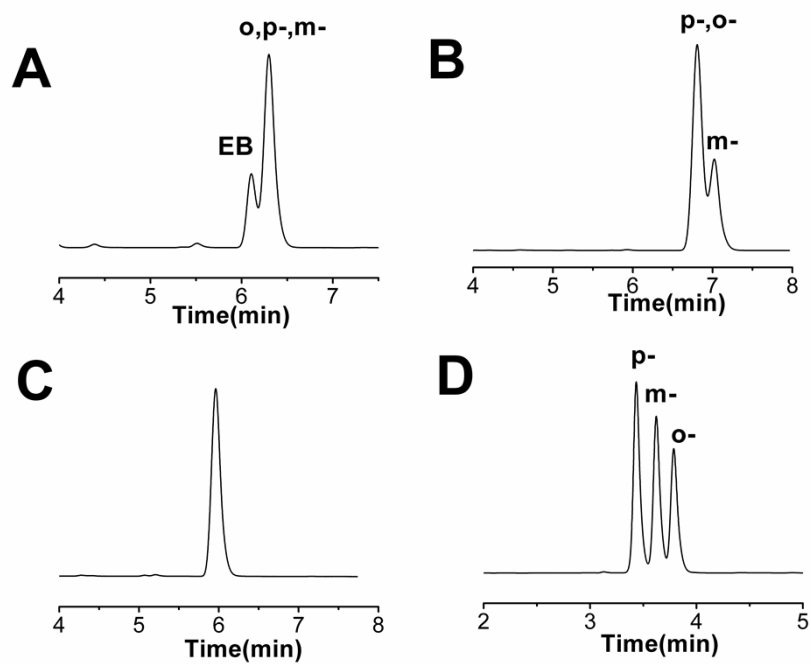

**Fig. S5.** HPLC chromatograms on the C8 column (25-cm long  $\times$  4.0-mm i.d., 5  $\mu$ m): (A) EB and xylene using  $\text{CH}_3\text{CN}/\text{H}_2\text{O}$  (50:50) as the mobile phase (B) Dichlorobenzene isomers using  $\text{CH}_3\text{CN}/\text{H}_2\text{O}$  (70:30) as the mobile phase. (C) Chlorotoluene isomers using  $\text{CH}_3\text{CN}/\text{H}_2\text{O}$  (60:40) as the mobile phase; (D) Nitroaniline isomers using  $\text{CH}_3\text{CN}/\text{H}_2\text{O}$  (60:40) as the mobile phase. Flow rate: 1.0  $\text{mL min}^{-1}$ . All the separations were performed at room temperature and monitored with a UV detector at 254 nm.

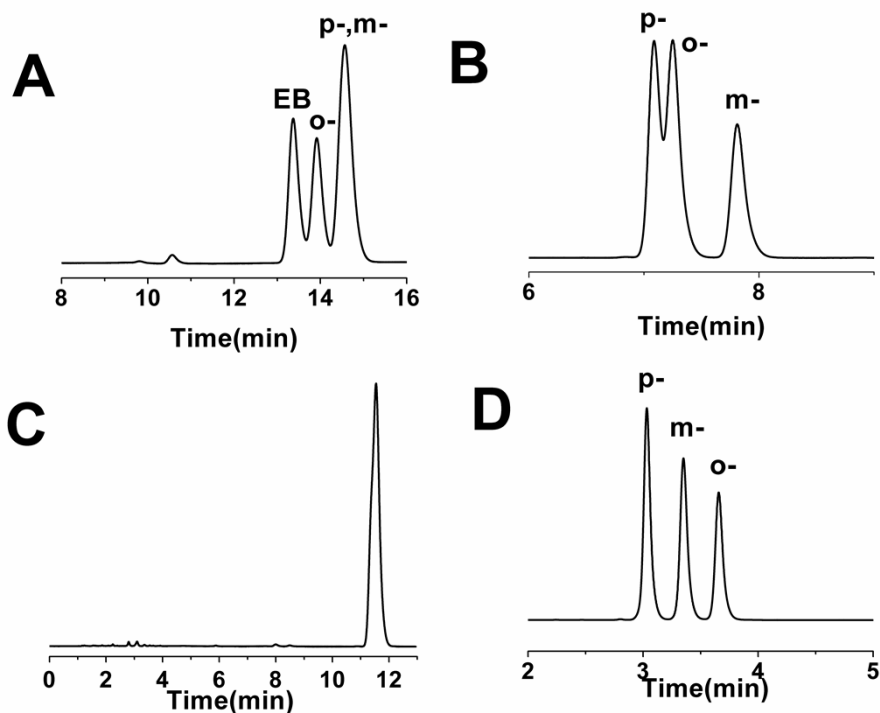

**Fig. S6.** HPLC chromatograms on the C18 column (25-cm long  $\times$  4.0-mm i.d., 5  $\mu$ m): (A) EB and xylene using  $\text{CH}_3\text{CN}/\text{H}_2\text{O}$  (70:30) as the mobile phase (B) Dichlorobenzene isomers using  $\text{CH}_3\text{CN}/\text{H}_2\text{O}$  (70:30) as the mobile phase. (C) Chlorotoluene isomers using  $\text{CH}_3\text{CN}/\text{H}_2\text{O}$  (70:30) as the mobile phase; (D) Nitroaniline isomers using  $\text{CH}_3\text{CN}/\text{H}_2\text{O}$  (70:30) as the mobile phase. Flow rate: 1.0  $\text{mL min}^{-1}$ . All the separations were performed at room temperature and monitored with a UV detector at 254 nm.

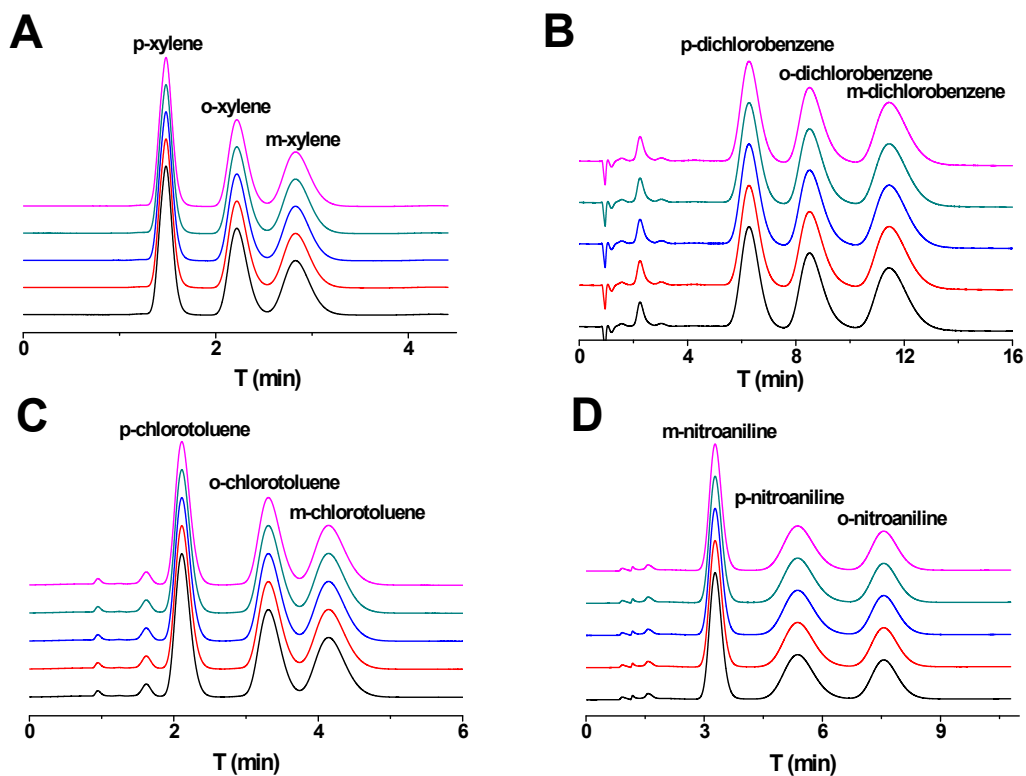

**Fig.S7.** Reproducibility of the chromatograms for HPLC on MIL-53(Fe) packed column: (A) xylene isomers using ACN/H<sub>2</sub>O (100:0) as the mobile phase; (B) dichlorobenzene isomers using ACN/H<sub>2</sub>O (80:20) as the mobile phase; (C) chlorotoluene isomers using ACN/H<sub>2</sub>O (100:0) as the mobile phase; (D) nitroaniline isomers using ACN/H<sub>2</sub>O (70:30) as the mobile phase at a flow rate of 0.6 mL min<sup>-1</sup>. All the separations were performed at room temperature and monitored with a UV detector at 254 nm.



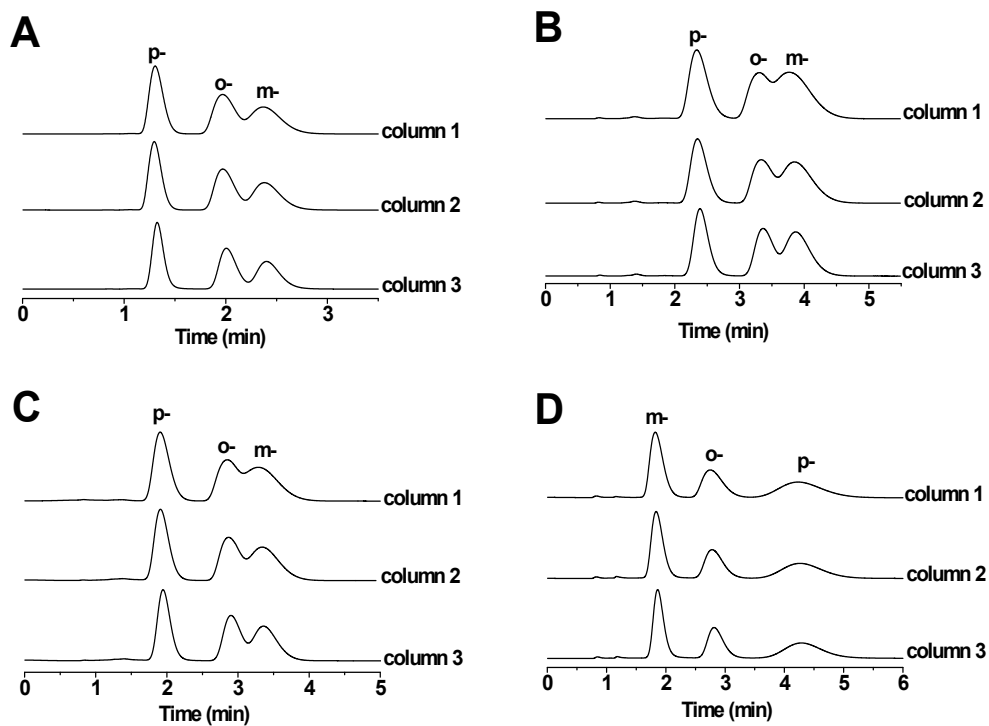

**Fig.S8.** Column-to-column reproducibility of the chromatograms for HPLC on MIL-53(Fe) packed columns: (A) xylene isomers, (B) dichlorobenzene isomers, (C) chlorotoluene isomers and (D) nitroaniline isomers at 25°C using 100% ACN as the mobile phase at a flow rate of 0.6 mL min<sup>-1</sup>. All the signals were monitored with a UV detector at 254nm.

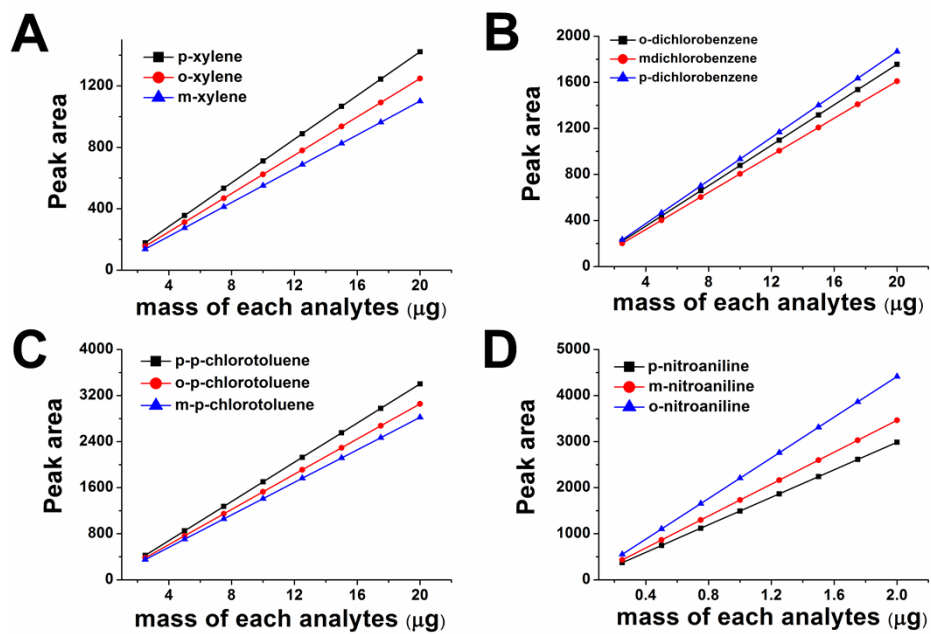

**Fig.S9.** Effects of mass on the peak area: (A) EB and p-, m- and o-xylene; (B) p-, m- and o-dichlorobenzene; (C) p-, m- and o- chlorotoluene; (D) p-, m- and o- nitroaniline. Condition see Fig. S7.

**Table S1** Resolutions of xylene, dichlorobenzene, chlorotoluene and nitroaniline isomers on the MIL-53(Fe) packed column in different mobile phase. Conditions see Fig. S2.

| Composition of mobile phase (ACN/H <sub>2</sub> O) | Resolution ( <i>R<sub>s</sub></i> ) |            |                 |            |               |            |              |            |
|----------------------------------------------------|-------------------------------------|------------|-----------------|------------|---------------|------------|--------------|------------|
|                                                    | xylene                              |            | dichlorobenzene |            | chlorotoluene |            | nitroaniline |            |
|                                                    | <i>o/p</i>                          | <i>m/o</i> | <i>o/p</i>      | <i>m/o</i> | <i>o/p</i>    | <i>m/o</i> | <i>p/m</i>   | <i>o/p</i> |
| 100:0                                              | 2.5                                 | 1.45       | 2.22            | 1.2        | 2.45          | 1.4        | -            | -          |
| 90:10                                              | 3.0                                 | 0.86       | 1.37            | 1.32       | 1.9           | 0.8        | 1.45         | 0.91       |
| 80:20                                              | 3.33                                | 1.01       | 1.86            | 2.04       | 2.1           | 1.07       | 1.93         | 1.34       |
| 70:30                                              | 4.24                                | 1.44       | 2.22            | 2.6        | 2.89          | 1.55       | 2.26         | 1.8        |
| 60:40                                              | 5.16                                | 1.84       | 2.3             | 2.94       | 3.58          | 1.9        | 2.69         | 2.37       |

**Table S2** Selectivity of xylene, dichlorobenzene, chlorotoluene and nitroaniline isomers on the MIL-53(Fe) packed column in the temperature range of 25–75°C. Separation conditions as shown in Fig. 4.

| <i>T</i> /°C | Selectivity ( $\alpha$ ) |            |                 |            |               |            |              |            |
|--------------|--------------------------|------------|-----------------|------------|---------------|------------|--------------|------------|
|              | xylene                   |            | dichlorobenzene |            | chlorotoluene |            | nitroaniline |            |
|              | <i>o/p</i>               | <i>m/o</i> | <i>o/p</i>      | <i>m/o</i> | <i>o/p</i>    | <i>m/o</i> | <i>p/m</i>   | <i>o/p</i> |
| 25           | 2.33                     | 1.33       | 1.86            | 1.22       | 1.63          | 1.20       | 1.81         | 1.91       |
| 35           | 2.28                     | 1.15       | 1.75            | 1.10       | 1.53          | 1.11       | 1.84         | 1.80       |
| 45           | 2.27                     | 1.08       | 1.67            | 1.03       | 1.45          | 1.04       | 1.89         | 1.64       |
| 55           | 2.29                     | 0.98       | 1.64            | 0.94       | 1.38          | 0.98       | 1.91         | 1.50       |
| 65           | 2.20                     | 0.91       | 1.60            | 0.88       | 1.34          | 0.94       | 1.95         | 1.35       |
| 75           | 2.20                     | 0.85       | 1.59            | 0.82       | 1.32          | 0.89       | 1.96         | 1.21       |

**Table S3** Selectivities of xylene, dichlorobenzene, chlorotoluene and nitroaniline isomers on the C8 and C18 columns.

| <i>column</i> | Selectivity ( $\alpha$ ) |            |                 |            |               |            |              |            |
|---------------|--------------------------|------------|-----------------|------------|---------------|------------|--------------|------------|
|               | xylene                   |            | dichlorobenzene |            | chlorotoluene |            | nitroaniline |            |
|               | <i>p/o</i>               | <i>m/o</i> | <i>o/p</i>      | <i>m/o</i> | <i>o/p</i>    | <i>m/o</i> | <i>m/p</i>   | <i>o/m</i> |
| C8 column     | 1.0                      | 1.0        | 1.0             | 1.07       | 1.0           | 1.06       | 1.8          | 1.4        |
| C18 column    | 1.3                      | 1.0        | 1.2             | 1.7        | 1.0           | 1.0        | 1.60         | 1.58       |

**Table S4** Column efficiency of MIL-53(Fe) packed column and C18 column for nitroaniline isomers. Separation conditions see Fig.S7 and Fig.S6 respectively.

| Analytes       | Column efficiency (plates m <sup>-1</sup> ) |       |
|----------------|---------------------------------------------|-------|
|                | MIL-53(Fe)                                  | C18   |
| m-nitroaniline | 2331                                        | 50464 |
| p-nitroaniline | 1480                                        | 48665 |
| o-nitroaniline | 3272                                        | 55158 |

**Table S5** Column-to-column reproducibility of the MIL-53(Fe) packed columns.

| analytes          | RSD (%) (n=3)  |           |           |            |            |
|-------------------|----------------|-----------|-----------|------------|------------|
|                   | retention time | peak area | Peak high | half width | peak width |
| p-xylene          | 1.13           | 1.50      | 10.49     | 8.18       |            |
| o-xylene          | 1.02           | 0.75      | 11.11     | 10.91      |            |
| m-xylene          | 0.68           | 2.66      | 12.54     | 10.52      |            |
| p-dichlorobenzene | 1.13           | 2.42      | 11.91     | 10.43      |            |
| o-dichlorobenzene | 0.87           | 6.26      | 6.69      | 13.3       |            |
| m-dichlorobenzene | 1.39           | 6.90      | 14.36     | 9.67       |            |
| p-chlorotoluene   | 1.15           | 1.97      | 10.83     | 9.88       |            |
| o-chlorotoluene   | 0.90           | 4.14      | 9.20      | 13.17      |            |
| m-chlorotoluene   | 1.13           | 4.14      | 13.93     | 9.98       |            |
| m-nitroaniline    | 1.09           | 5.37      | 11.69     | 14.44      |            |
| p- nitroaniline   | 1.15           | 5.64      | 12.97     | 17.01      |            |
| o- nitroaniline   | 1.31           | 4.87      | 5.53      | 10.62      |            |
